# Supplementary material for: Self-Reported Sensory Impairments and Changes in Cognitive Performance: A Longitudinal 6-Year Follow-Up Study of English Community-Dwelling Adults Aged ⩾50 Years
Source: PubMed Central journal article supplement (PMC7221867; doi:10.1177/0898264318815391), 2018-12-06
Supplement: Supplementary_table_1_AL220518.pdf [file Supplementary_table_1_AL220518.pdf]

**Supplementary table 1.** Beta coefficients with 95% confidence intervals (CI) for relationships of vision impairment, hearing impairment and dual sensory impairment at baseline in 2008 with each of the three cognitive domains; executive functioning, immediate recall of 10 words, and delayed recall of 10 words at 6 years of follow up in 2014

| Cognitive domain                                                       | Poor hearing<br>n=4621 |         | Poor vision<br>n=4621 |         | Dual sensory impairment<br>n=3641 |         |
|------------------------------------------------------------------------|------------------------|---------|-----------------------|---------|-----------------------------------|---------|
|                                                                        | $\beta$ (95% CI)       | p-value | $\beta$ (95% CI)      | p-value | $\beta$ (95% CI)                  | p-value |
| <b>Executive functioning (animal naming)</b>                           |                        |         |                       |         |                                   |         |
| Model 1 (M1): adjusted for age, sex, executive functioning at baseline | 0.45 (0.01, 0.88)      | 0.03    | 1.06 (0.51, 1.61)     | <0.01   | 1.60 (0.72, 2.49)                 | <0.01   |
| Model 2 (M2): M1 + wealth, education                                   | 0.35 (-0.08, 0.79)     | 0.11    | 0.74 (0.18, 1.30)     | 0.01    | 1.26 (0.38, 2.15)                 | 0.01    |
| Model 3 (M3): M2 + alcohol, smoking, physical activity, BMI            | 0.30 (-0.13, 0.74)     | 0.17    | 0.60 (0.04, 1.16)     | 0.04    | 1.11 (0.22, 2.00)                 | 0.02    |
| Model 4 (M4): M3 + CVD, diabetes, hypertension                         | 0.29 (-0.15, 0.73)     | 0.19    | 0.60 (0.03, 1.16)     | 0.04    | 1.10 (0.21, 1.99)                 | 0.02    |
| Model 5 (M5): M4 + falls, mobility                                     | 0.27 (-0.17, 0.70)     | 0.24    | 0.57 (0.01, 1.14)     | 0.05    | 1.02 (0.13, 1.92)                 | 0.03    |
| Model 6 (M6): M5 + depression, lack of companionship                   | 0.25 (-0.20, 0.69)     | 0.27    | 0.58 (0.01, 1.16)     | 0.05    | 1.08 (0.16, 1.99)                 | 0.02    |
| <b>Immediate recall of 10 words</b>                                    |                        |         |                       |         |                                   |         |
| Model 1 (M1): adjusted for age, sex, immediate recall at baseline      | 0.27 (0.15, 0.38)      | <0.01   | 0.42 (0.28, 0.57)     | <0.01   | 0.61 (0.38, 0.84)                 | <0.01   |
| Model 2 (M2): M1 + wealth, education                                   | 0.23 (0.12, 0.35)      | <0.01   | 0.31 (0.16, 0.46)     | <0.01   | 0.47 (0.24, 0.69)                 | <0.01   |
| Model 3 (M3): M2 + alcohol, smoking, physical activity, BMI            | 0.22 (0.10, 0.33)      | <0.01   | 0.27 (0.12, 0.41)     | <0.01   | 0.43 (0.20, 0.66)                 | <0.01   |
| Model 4 (M4): M3 + CVD, diabetes, hypertension                         | 0.21 (0.09, 0.31)      | <0.01   | 0.26 (0.11, 0.40)     | <0.01   | 0.41 (0.18, 0.63)                 | <0.01   |
| Model 5 (M5): M4 + falls, mobility                                     | 0.20 (0.08, 0.31)      | <0.01   | 0.24 (0.09, 0.39)     | <0.01   | 0.38 (0.15, 0.61)                 | <0.01   |
| Model 6 (M6): M5 + depression, lack of companionship                   | 0.20 (0.08, 0.32)      | <0.01   | 0.23 (0.08, 0.38)     | <0.01   | 0.38 (0.15, 0.62)                 | <0.01   |
| <b>Delayed recall of 10 words</b>                                      |                        |         |                       |         |                                   |         |
| Model 1 (M1): adjusted for age, sex, delayed recall at baseline        | 0.27 (0.14, 0.40)      | <0.01   | 0.33 (0.17, 0.49)     | <0.01   | 0.50 (0.25, 0.76)                 | <0.01   |
| Model 2 (M2): M1 + wealth, education                                   | 0.25 (0.12, 0.38)      | <0.01   | 0.22 (0.05, 0.39)     | 0.01    | 0.37 (0.11, 0.63)                 | 0.01    |
| Model 3 (M3): M2 + alcohol, smoking, physical activity, BMI            | 0.23 (0.10, 0.36)      | <0.01   | 0.17 (0.01, 0.34)     | 0.04    | 0.33 (0.07, 0.59)                 | 0.01    |
| Model 4 (M4): M3 + CVD, diabetes, hypertension                         | 0.22 (0.09, 0.35)      | <0.01   | 0.17 (0.00, 0.33)     | 0.05    | 0.32 (0.06, 0.58)                 | 0.02    |
| Model 5 (M5): M4 + falls, mobility                                     | 0.21 (0.08, 0.34)      | <0.01   | 0.15 (-0.02, 0.32)    | 0.07    | 0.29 (0.03, 0.55)                 | 0.03    |
| Model 6 (M6): M5 + depression, lack of companionship                   | 0.21 (0.08, 0.34)      | <0.01   | 0.14 (-0.03, 0.31)    | 0.10    | 0.30 (0.03, 0.57)                 | 0.03    |
